# Supplementary material
Source: HighWire-hosted journal article supplement (https://www.cmajopen.ca/highwire/filestream/81247/field_highwire_adjunct_files/1/2019-0094-original-submission.pdf)
Supplement: 2019-0094-original-submission.pdf [file 2019-0094-original-submission.pdf]

1  
2  
3 **Physicians cannot meet the need for publicly funded psychotherapy in Ontario: a population-**  
4 **based retrospective cohort study.**  
5

6  
7 Paul Kurdyak MD PhD<sup>1,3</sup>

8 Juveria Zaheer MD MSc<sup>1,2</sup>

9 André Carvalho MD PhD<sup>1,2</sup>

10 Claire de Oliveira PhD<sup>1,4</sup>

11 Michael Lebenbaum MSc<sup>3</sup>

12 Drew Wilton MSc<sup>3</sup>

13 Mark Fefergrad MD<sup>2</sup>

14 Vicky Stergiopoulos MD MSc<sup>1,2</sup>

15 Benoit H. Mulsant MD MS<sup>1,2</sup>  
16  
17  
18

19 <sup>1</sup>Centre for Addiction and Mental Health, Toronto, ON, Canada

20 <sup>2</sup>Department of Psychiatry, Faculty of Medicine, University of Toronto, Toronto, ON, Canada

21 <sup>3</sup>ICES, Toronto, ON, Canada

22 <sup>4</sup>Institute for Health Policy, Management and Evaluation, Faculty of Medicine, University of  
23 Toronto, Toronto, ON, Canada  
24  
25  
26  
27

28 **Corresponding Author**  
29

30 Paul Kurdyak MD PhD FRCPC

31 CAMH

32 33 Russell Street, T305

33 Toronto, ON

34 M5S 2S1

35 Email: [paul.kurdyak@camh.ca](mailto:paul.kurdyak@camh.ca)  
36  
37  
38  
39

40 **Funding Statement**

41 This work was supported in part by the Medical Psychiatry Alliance, a collaborative health  
42 partnership of the University of Toronto, the Centre for Addiction and Mental Health, the  
43 Hospital for Sick Children, Trillium Health Partners, the Ontario MOHLTC and an anonymous  
44 donor.  
45  
46

47 **Declaration of Competing Interests**

48 The authors have no competing interests or conflicts of interest to declare.  
49  
50  
51  
52  
53  
54  
55  
56  
57  
58  
59  
60

## **Abstract**

**Introduction:** Psychotherapy is recommended as a first-line treatment for the management of common psychiatric disorders. The objective of this study was to evaluate the availability of publicly funded psychotherapy in Ontario by describing primary care physicians (PCPs) and psychiatrists whose practices focus on psychotherapy and comparing them to PCPs and psychiatrists whose practices do not.

**Methods:** We included all PCPs and psychiatrists in Ontario between April 1, 2015 and March 31, 2016 and categorized them as psychotherapists if at least 50% of their practice was devoted to psychotherapy. We measured practice characteristics such as total number of patients, new patients, and average visit frequency for each of the 4 physician categories. We also measured access to care for individuals with urgent need of mental health services.

**Results:** Of 12,772 PCPs, 3.2% were PCP psychotherapists; of 2150 psychiatrists, 27.3% were psychotherapists. Number of patients, number of new patients, and average number of visits per patient ranked from highest to lowest among: PCP non-psychotherapists, psychiatrist non-psychotherapists, PCP psychotherapists, and psychiatrist psychotherapists. Non-psychotherapist PCPs and psychiatrists saw approximately 25% of patients with urgent needs for mental health services, whereas PCP and psychiatrist psychotherapists saw between 1 and 3% of these patients.

**Conclusion:** Physicians who provide publicly-funded psychotherapy in Ontario see a small number of patients and they do not see those with urgent need for mental health services. Increasing the number of physicians providing psychotherapy is unlikely to improve access to psychotherapy in a publicly funded system.

## Introduction

Depressive and anxiety disorders are the most common psychiatric disorders; from a public health perspective, they are associated with the highest burden of disability<sup>1,2</sup>. Evidence-based treatment guidelines for these common psychiatric disorders recommend brief structured psychotherapies as first line treatment options, particularly for mild to moderate disorders<sup>3-5</sup>. In Ontario, access to publicly-funded psychotherapy is provided mostly by primary care physicians with psychotherapy-focused practices (PCP psychotherapists) and psychiatrists. In August 2018, the Coalition of Ontario Psychiatrists asserted there was a “crisis in access to mental health services” in Ontario and they attributed this crisis to a shortage of psychiatrists<sup>6</sup>. They made three recommendations, all with the goal of increasing the number of psychiatrists: to increase exposure to psychiatry in medical school; to train more psychiatrists; and to increase the payment for psychiatrists’ services. However, it is not known the extent to which current physician psychotherapists, which include both PCP psychotherapists and psychiatrists, meet demand for psychotherapy in Ontario and thus, how many additional physician psychotherapists would be needed to better meet this demand.

To address these two questions, we conducted a study of the existing physician-based availability of psychotherapy in Ontario. We categorized all Ontarian PCPs and psychiatrists as psychotherapists or non-psychotherapists, resulting in four physician categories. We characterized the practices of physicians within these four categories. Finally, we determined whether patients with urgent need for mental health services were seen within 30- or 180-days by physicians from each of these four groups.

## **Methods**

We conducted a retrospective cohort study of four Ontario physician categories between April 1, 2015 and March 31, 2016: 1) PCP non-psychotherapists (PCPs with <50% of billings related to psychotherapy); 2) PCP psychotherapists with  $\geq 50\%$  of billings related to psychotherapy; 3) psychiatrist non-psychotherapists (psychiatrists with <50% of billings related psychotherapy); and 4) psychiatrist psychotherapists ( $\geq 50\%$  of billings related to psychotherapy). Ontario Health Insurance Program (OHIP) billing codes used to capture psychotherapy are listed in Appendix Table 1.

### **Data Sources**

PCP and psychiatrist characteristics were obtained from the Institute for Clinical Evaluative Sciences (ICES) Physician Database (IPDB). Physician practice patterns and the characteristics of their patients were obtained from the OHIP database (outpatient billing information), the National Ambulatory Care Reporting System (information on ED visits), the Ontario Mental Health Reporting System and the Canadian Institute of Health Information Discharge Abstract Database (information on psychiatric hospitalizations), the Registered Persons Database (socio-demographic characteristics), and Immigration Refugee Citizenship Canada (immigration data). These datasets were linked using unique encoded identifiers and analyzed at ICES. The use of data in this study was authorized under section 45 of Ontario's Personal Health Information Protection Act, which does not require review by a Research Ethics Board.

### **Study Sample**

1  
2  
3 PCPs and psychiatrists who submitted at least 1 billing claim to OHIP between April 1, 2015 and  
4  
5 March 31, 2016 were included. We focused on outpatients who were provided care and  
6  
7 excluded all billings related to inpatient care for both PCPs and psychiatrists.  
8  
9

### 10 **Physician Characteristics**

11  
12 We assessed the following characteristics per physician: sex ,age, medical school attended, and  
13  
14 region of practice (based on the 14 Ontario Local Health Integration Network (LHIN) boundaries  
15  
16 categorized as High Supply (Toronto and Champlain (Ottawa) LHINs), Medium Supply (South  
17  
18 West, South East, and Hamilton Niagara Haldimand Brant), and Low Supply (nine other LHINs)<sup>7</sup>.  
19

20  
21 We also determined whether physicians were full-time using the Health Canada definition:  
22  
23 having annual billings above the 30<sup>th</sup> percentile for all Ontario PCPs or psychiatrists,  
24  
25 respectively<sup>8</sup>. For each physician, we measured the number of unique outpatients, new  
26  
27 outpatients (defined as no visits in 12 months prior to the first visit in the study period), and  
28  
29 mean number of annual visits/patient. Finally, we measured the number of physicians in each  
30  
31 of the four physician categories with fewer than 200, 100 and 40 patients seen annually.  
32  
33  
34  
35  
36

### 37 **Patient Characteristics for the Four Physician Categories**

38  
39 We measured characteristics of outpatients seen by physicians in the four categories. For  
40  
41 patients seen by more than one physician, the patient was assigned to the physician with the  
42  
43 highest visit frequency for that patient. We measured the following patient characteristics: sex,  
44  
45 age, income (neighbourhood income quintile based on Census information), and residential  
46  
47 region using the same categories applied to physicians. We also assessed in the 24 months prior  
48  
49 to April 1, 2015, the proportions of patients who experienced any of the following 4 events: a  
50  
51  
52  
53  
54  
55  
56  
57  
58  
59  
60

1  
2  
3 psychiatric hospitalization, an ED visit for a mental health reason, an ED visit for self-harm, or  
4  
5 two or more ED visits for substance use.  
6

### 7 **Access to Physicians for Patients with Urgent Need for Mental Health Services**

8  
9  
10 We measured the number of patients who had a psychiatric hospitalization, ED visit for a  
11  
12 mental health reason, ED visit for self-harm, or two or more ED visits for substance use  
13  
14 between April 1, 2014 and March 31, 2016. For patients seen twice in the ED for substance use,  
15  
16 the second of two visits was used to measure access to care. For other patient groups we used  
17  
18 the ED or hospital discharge date. These four patient groups were not mutually exclusive. We  
19  
20 assessed whether patients from these four groups were seen by physicians from each of the  
21  
22 four categories within 30- and 180-days. If a patient saw more than one type of physician, each  
23  
24 of the physicians they saw was credited for the visit he or she provided.  
25  
26  
27  
28

### 29 **Statistical Analysis**

30  
31 For each variable, we examined the mean and standard deviation, median, and interquartile  
32  
33 ratio (IQR), or number and proportion. We used standardized differences to assess differences  
34  
35 between psychotherapists and non-psychotherapists separately for PCPs and for psychiatrists.  
36  
37 A standardized difference of greater than 0.1 is considered clinically significant<sup>9</sup>. We used SAS  
38  
39 Version 9 for all statistical analyses<sup>10</sup>.  
40  
41  
42  
43  
44  
45

## 46 **Results**

### 47 **Physician Characteristics**

48  
49 Between April 1, 2015 and March 31, 2016, there were 12,772 primary care physicians who  
50  
51 were clinically active in Ontario, of whom 404 (3.2%) met our criteria as PCP psychotherapists  
52  
53 and 12,368 (96.8%) were PCP non-psychotherapists. During the same time period, there were  
54  
55  
56  
57  
58  
59  
60

1  
2  
3 2150 psychiatrists in Ontario, of whom 586 (27.3%) were psychiatrist who met our criteria for  
4  
5 psychotherapist and 1564 (72.8%) were psychiatrist non-psychotherapists. The demographic,  
6  
7 practice patterns, medical school graduation, and regional characteristics of these four  
8  
9 physician categories are outlined in Table 1.  
10  
11  
12  
13  
14

15 Both PCP and psychiatrist psychotherapists are approximately 9 to 10 years older than their  
16  
17 non-psychotherapist colleagues (Table 1), and a higher proportion of both types of  
18  
19 psychotherapists are in the oldest age category ( $\geq 60$  years). A smaller proportion of PCP  
20  
21 psychotherapists (54%) met the definition of a full-time physician than the other three  
22  
23 categories of physicians, which were all approximately 70% full-time. More than a quarter of  
24  
25 both types of psychotherapists graduated from the University of Toronto medical school,  
26  
27 whereas a higher proportion of non-psychotherapist physicians graduated from non-Canadian  
28  
29 medical schools. Psychiatrists, both psychotherapist and non-psychotherapist, were more likely  
30  
31 to practice in high supply LHINs than PCP non-psychotherapists. PCP and psychiatrist  
32  
33 psychotherapists were more likely to practice in the two LHINs (Toronto Central and Champlain)  
34  
35 with the highest supply of psychiatrists.  
36  
37  
38  
39  
40  
41  
42  
43  
44

### 45 **Physician Practice Characteristics**

46  
47 The total number of patients, outpatients, or new outpatients were highest in PCP non-  
48  
49 psychotherapists, followed by psychiatrist non-psychotherapists, PCP psychotherapists, and  
50  
51 psychiatrist psychotherapists (Table 2). The visit frequency followed the reverse pattern, with  
52  
53 psychiatrist psychotherapists having the highest visit frequencies, and PCP non-  
54  
55  
56  
57  
58  
59  
60

1  
2  
3 psychotherapists having the lowest. This pattern of patient number and visit frequency  
4  
5 translated into 24%, 20%, 13%, and 4% of psychiatrist psychotherapists, PCP psychotherapists,  
6  
7 psychiatrist non-psychotherapists, and PCP non-psychotherapists, respectively, seeing fewer  
8  
9 than 40 patients annually. The average visit frequency for non-psychotherapist physicians was  
10  
11 three times or fewer in a year, whereas the average visit frequency for psychotherapist  
12  
13 physicians was much higher, with some physicians with annual average visit frequencies per  
14  
15 patient as high as 40.  
16  
17  
18  
19  
20  
21  
22

### 23 **Patient Characteristics**

24  
25 The patients of both types of psychotherapists were slightly more likely to be female than those  
26  
27 of non-psychotherapists (Table 3). The age of patients across the four physician categories were  
28  
29 similar. Psychotherapists saw a slightly higher proportion of patients from high income quintile  
30  
31 neighbourhoods and psychiatrist non-psychotherapists saw a slightly higher proportion of  
32  
33 patients from neighbourhoods with the lowest income quintile. The regional pattern of patients  
34  
35 was similar to the regional pattern of physician practices, with patients seen by  
36  
37 psychotherapists predominantly living in Toronto Central and Champlain LHINs. The two  
38  
39 categories of psychiatrists had similar proportions of patients who were in the four groups with  
40  
41 urgent need for mental health services. PCP psychotherapists had a smaller proportion of  
42  
43 patients in these four groups than the two categories of psychiatrists, but larger than PCP non-  
44  
45 psychotherapists. However, in terms of absolute number of patients, PCP non-psychotherapists  
46  
47 saw the highest number of patients for mental health and addiction reasons, including those in  
48  
49 our four groups with urgent needs, followed by psychiatrist non-psychotherapists. PCP  
50  
51  
52  
53  
54  
55  
56  
57  
58  
59  
60



1  
2  
3 psychotherapists saw slightly more patients than psychiatrist psychotherapists, including more  
4  
5 patients with two or more substance-related ED visits in the past 12 months. However,  
6  
7 psychiatrist psychotherapists saw more patients in the other three groups of patients with  
8  
9 urgent need.  
10  
11  
12  
13  
14

### 15 **Access to Physicians for Patients with Urgent Need for Mental Health Services**

16  
17 Table 4 shows the proportion of patients in the four urgent need patient groups who were seen  
18  
19 within 30 and 180 days by physicians within each of the four categories. In each of these  
20  
21 patient groups, approximately half of the patients did not have any physician visit within 30  
22  
23 days and one quarter to one third did not have any physician visit within 180 days. Non-  
24  
25 psychotherapist PCPs and psychiatrists saw a similar proportion of patients, approximately one  
26  
27 quarter, with the exception of the patients with two or more ED visits for substance-related  
28  
29 issues: non-psychotherapist PCPs saw more than twice as many of these patients than non-  
30  
31 psychotherapist psychiatrists (29.8% vs. 13.9%). PCP or psychiatrist psychotherapists saw very  
32  
33 few (2-3%) patients with urgent needs for mental health services.  
34  
35  
36  
37  
38  
39  
40  
41

### 42 **Discussion**

43  
44 There were just under 1000 physicians with practices focused on psychotherapy in Ontario in  
45  
46 fiscal year 2015. Approximately 60% of these psychotherapist physicians were psychiatrists. The  
47  
48 psychotherapist physicians were older than their non-psychotherapist colleagues and clustered  
49  
50 in two large cities (Toronto and Ottawa). They saw a much smaller number of patients and saw  
51  
52  
53  
54  
55  
56  
57  
58  
59  
60

1  
2  
3 them much more frequently. They served only a very low proportion (1-3%) of patients with  
4  
5 urgent need for mental health services.  
6  
7  
8  
9

10 Our findings address the question of whether physician psychotherapists can address  
11  
12 population need for psychotherapy in Ontario. Using a conservative one-year prevalence of  
13  
14 major depressive disorder of 4%<sup>11</sup> and the number of Ontarians older than 14 in 2016  
15  
16 (11,240,525<sup>12</sup>), there were 450,000 individuals with major depressive disorder. With at least a  
17  
18 similar number with anxiety disorders or adjustment disorders, one can estimate that 900,000  
19  
20 or more Ontarians could have benefitted from psychotherapy. Psychotherapist physicians saw  
21  
22 93,743 patients in 2015 and 2016, including a substantial number of patients seen only once.  
23  
24  
25 The existing complement of Ontario psychotherapist physicians cannot meet the need for  
26  
27  
28 psychotherapy for common mental disorders.  
29  
30  
31  
32  
33  
34

35 While there is a shortage of psychiatrists in certain Ontario regions, there is a surplus in Toronto  
36  
37 and Ottawa<sup>7,13</sup>. Our study suggests that psychotherapist physicians are similarly concentrated in  
38  
39 these two cities. Even if the number of psychiatrists trained in Ontario doubled over the next  
40  
41 ten years and all these new psychiatrists became psychotherapists, physician psychotherapists  
42  
43 still would not meet the psychotherapy-related needs of the population.  
44  
45  
46  
47  
48  
49

50 Furthermore, our findings demonstrate that existing PCPs and psychiatrists dedicating their  
51  
52 practice to psychotherapy have practice patterns that are not responsive to populations with  
53  
54 urgent mental health needs. As has been discussed in prior studies on psychiatrist supply in  
55  
56  
57  
58  
59  
60

1  
2  
3 Ontario<sup>7,14</sup>, the current OHIP payment process is entirely fee-for-service and does not stipulate  
4  
5 limits on visit frequency or the type of patient who should receive services. This largely explains  
6  
7 the low volume practices where patients are seen with high frequency. The low rate of access  
8  
9 observed more generally (for example, 50% and 60% of individuals with ED visits for self-harm  
10  
11 or substance use, respectively, saw no physician within 30 days of their ED visit discharge)  
12  
13 suggest a broader mental health service access problem.  
14  
15  
16  
17  
18  
19

20 Even if financial incentives were better aligned with population need, publicly funded physician  
21  
22 psychotherapists cannot meet the need for evidence-based psychotherapy. Other jurisdictions  
23  
24 have developed system responses to meet this need. In England, Increasing Access to  
25  
26 Psychotherapy (IAPT) is now a well-established system that uses teams of trained lay therapists  
27  
28 and measurement-based care processes to provide evidence-based psychotherapies such as  
29  
30 CBT and interpersonal psychotherapy<sup>15</sup> for a variety of mental disorders<sup>16</sup>. In the United States,  
31  
32 health maintenance organizations (HMOs) run by private insurance companies use non-  
33  
34 physicians to provide evidence-based psychotherapy, with psychiatrists largely providing  
35  
36 consultations and pharmacotherapy.  
37  
38  
39  
40  
41  
42  
43  
44

45 To our knowledge, this is the first study in Canada that measure the existing supply of publicly  
46  
47 funded psychotherapists, their practice patterns, and their ability to respond to urgent need.  
48  
49 Strengths of this study include the use of population-based data that captures all physicians in  
50  
51 Ontario providing psychotherapy and the patients they serve. There are several limitations to  
52  
53 this approach. There are non-physician psychotherapists in Ontario who work in hospital and  
54  
55  
56  
57  
58  
59  
60

1  
2  
3 community settings who provide services free of charge by Ontario's Ministry of Health and  
4  
5 Long-term Care. We are unable to determine the scope of this supply of psychotherapy in  
6  
7 Ontario. Thus, our study underestimates the total supply of publicly-funded psychotherapists in  
8  
9 Ontario; but we do not believe the number of these therapists is large enough to invalidate our  
10  
11 main findings. Second, we do not know what type of psychotherapies were provided by  
12  
13 physician psychotherapists. It is likely that some of these psychotherapies are unstructured and  
14  
15 do not adhere to an evidence-based framework, which would further reduce the impact of and  
16  
17 access to psychotherapies. Third, we do not know whether the patients being seen by physician  
18  
19 psychotherapists actually need the services they are receiving. Finally, we do not know which  
20  
21 patients from the four groups with urgent need would benefit from access to psychotherapy.  
22  
23 However, we believe that a proportion far greater than the 1 in 33 to 1 in 85 who were seen by  
24  
25 physician psychotherapists would benefit from evidence-based psychotherapies.  
26  
27  
28  
29  
30  
31  
32  
33  
34

35 In summary, evidence-based psychotherapy should be available to patients suffering from the  
36  
37 most prevalent mental disorders. Our study suggests that there are far too few publicly-funded  
38  
39 physician psychotherapists to meet the needs of these patients. Moreover, existing physician  
40  
41 psychotherapists are not equitably geographically distributed in Ontario, and most have  
42  
43 adopted practice styles that further impede access. The recommendation to increase the  
44  
45 number of psychiatrists in Ontario, while relevant to areas with critical shortages, will not  
46  
47 address the existing poor access to psychotherapy. The Ontario government is in the midst of a  
48  
49 pilot project that is based on a model of a population-based psychotherapy intervention that  
50  
51 has been extensively evaluated and shown to be successful<sup>16</sup>. This model of service delivery  
52  
53  
54  
55  
56  
57  
58  
59  
60

1  
2  
3 adheres to evidence and uses non-physician psychotherapists. It may equitably and efficiently  
4  
5 increase access to publicly funded psychotherapy.  
6  
7  
8  
9

### 10 **Acknowledgements**

11  
12 This study was supported by the Institute for Clinical Evaluative Sciences (ICES), which is funded  
13  
14 by an annual grant from the Ontario Ministry of Health and Long-Term Care (MOHLTC). The  
15  
16 opinions, results and conclusions reported in this paper are those of the authors and are  
17  
18 independent from the funding sources. No endorsement by ICES or the Ontario MOHLTC is  
19  
20 intended or should be inferred. Parts of this material are based on data and/or information  
21  
22 compiled and provided by CIHI. However, the analyses, conclusions, opinions and statements  
23  
24 expressed in the material are those of the author(s), and not necessarily those of CIHI.  
25  
26  
27  
28  
29  
30  
31  
32  
33  
34  
35  
36  
37  
38  
39  
40  
41  
42  
43  
44  
45  
46  
47  
48  
49  
50  
51  
52  
53  
54  
55  
56  
57  
58  
59  
60

## References

1. Lopez A, Mathers C, Ezzati M, Jamison D, Murray C. Global and regional burden of disease and risk factors, 2001: systematic analysis of population health data. *Lancet*. 2006;367(9524):1747-1757.
2. Baxter AJ, Vos T, Scott KM, Ferrari AJ, Whiteford HA. The global burden of anxiety disorders in 2010. *Psychol Med*. 2014;44(11):2363-2374.
3. Parikh SV, Quilty LC, Ravitz P, et al. Canadian Network for Mood and Anxiety Treatments (CANMAT) 2016 Clinical Guidelines for the Management of Adults with Major Depressive Disorder: Section 2. Psychological Treatments. *Can J Psychiatry*. 2016;61(9):524-539.
4. National Institute for Health and Care Excellence (NICE). Depression in adults: recognition and management. In. Vol CG90: United Kingdom; 2009.
5. Excellence NifHaC. Generalized anxiety disorder and panic disorder in adults: management. In. Vol CG113. United Kingdom 2011.
6. Coalition of Ontario Psychiatrists. *Ontario needs psychiatrists: chronic psychiatry shortage*. Toronto, Ontario 2017.
7. Kurdyak P, Stukel T, Goldbloom D, Zagorski B, Kopp A, Mulsant B. Universal coverage without universal access: a study of psychiatrist supply and practice patterns in Ontario. *Open Medicine*. 2014;8(3):87-99.
8. Canadian Institute for Health Information (CIHI). Full-time equivalent physicians report, fee-for-service physicians in Canada, 2004-2005. In. Ottawa: Canadian Institute for Health Information; 2006.
9. Austin P. Using the standardized difference to compare the prevalence of a binary variable between two groups in observational research. *Communications in Statistics - Simulation and Computation*. 2009;38(6):1228-1234.
10. SAS. SAS System, Version 9: Installation and Administration Information. 2007.
11. Patten SB, Williams JV, Lavorato DH, Wang JL, McDonald K, Bulloch AG. Descriptive epidemiology of major depressive disorder in Canada in 2012. *Can J Psychiatry*. 2015;60(1):23-30.
12. 2016 Census: Ontario (Province) and Canada (Country). 2019; <https://www12.statcan.gc.ca/census-recensement/2016/dp-pd/prof/details/Page.cfm?Lang=E&Geo1=PR&Code1=35&Geo2=&Code2=&Data=Count&SearchText=Ontario&SearchType=Begins&SearchPR=01&B1=All&GeoLevel=PR&GeoCode=35>. Accessed February 23, 2019, 2019.
13. Kurdyak P, Zaheer J, Cheng J, Rudoler D, Mulsant BH. Changes in Characteristics and Practice Patterns of Ontario Psychiatrists. *Can J Psychiatry*. 2017;62(1):40-47.
14. Rudoler D, de Oliveira C, Cheng J, Kurdyak P. Payment incentives for community-based psychiatric care in Ontario, Canada. *CMAJ*. 2017;189(49):E1509-E1516.
15. Markowitz JC, Weissman MM. Interpersonal psychotherapy: principles and applications. *World psychiatry : official journal of the World Psychiatric Association (WPA)*. 2004;3(3):136-139.

- 16. Clark DM, Canvin L, Green J, Layard R, Pilling S, Janecka M. Transparency about the outcomes of mental health services (IAPT approach): an analysis of public data. *Lancet*. 2017.

Confidential

1  
2  
3  
4  
5  
6  
7  
8  
9  
10  
11  
12  
13  
14  
15  
16  
17  
18  
19  
20  
21  
22  
23  
24  
25  
26  
27  
28  
29  
30  
31  
32  
33  
34  
35  
36  
37  
38  
39  
40  
41  
42  
43  
44  
45  
46  
47

Table 1: Characteristics of Physicians Providing Psychotherapy in Ontario.

|                                                              | PCP<br>Psychotherapists | PCP non-<br>psychotherapists | SD   | Psychiatrist -<br>psychotherapist | Psychiatrist non-<br>psychotherapist | SD   |
|--------------------------------------------------------------|-------------------------|------------------------------|------|-----------------------------------|--------------------------------------|------|
| <b>Physician Characteristics</b>                             | N=404                   | N=12,368                     |      | N=586                             | N=1,564                              |      |
| Sex (%F)                                                     | 206 (51.0%)             | 5,712 (46.2%)                | 0.10 | 239 (40.8%)                       | 659 (42.1%)                          | 0.03 |
| Age, mean, (SDev)                                            | 59.8 (11.5)             | 51.2 (12.3)                  | 0.73 | 63.0 (11.0)                       | 52.9 (11.8)                          | 0.88 |
| <30, N(%)                                                    | 0 (0.0%)                | 136 (1.1%)                   | 0.15 |                                   |                                      |      |
| 30-39, N(%)                                                  | 24 (5.9%)               | 2,173 (17.6%)                | 0.37 | 16 (2.7%)                         | 208 (13.3%)                          | 0.40 |
| 40-49, N(%)                                                  | 47 (11.6%)              | 2,628 (21.2%)                | 0.26 | 49 (8.4%)                         | 386 (24.7%)                          | 0.45 |
| 50-59, N(%)                                                  | 121 (30.0%)             | 3,038 (24.6%)                | 0.12 | 146 (24.9%)                       | 372 (23.8%)                          | 0.03 |
| 60+, N(%)                                                    | 204 (50.5%)             | 2,992 (24.2%)                | 0.57 | 367 (62.6%)                       | 443 (28.3%)                          | 0.73 |
| Missing                                                      | 8 (2.0%)                | 1,401 (11.3%)                | 0.38 | 8 (1.4%)                          | 155 (9.9%)                           | 0.38 |
| Full-time N (%)                                              | 218 (54.0%)             | 8,721 (70.5%)                | 0.35 | 417 (71.2%)                       | 1,088 (69.6%)                        | 0.03 |
| Medical School                                               |                         |                              |      |                                   |                                      |      |
| U of T, N(%)                                                 | 115 (28.5%)             | 2,615 (21.1%)                | 0.17 | 148 (25.3%)                       | 185 (11.8%)                          | 0.35 |
| Ottawa, N(%)                                                 | 34 (8.4%)               | 914 (7.4%)                   | 0.04 | 23 (3.9%)                         | 82 (5.2%)                            | 0.06 |
| Queen's, N(%)                                                | 25 (6.2%)               | 656 (5.3%)                   | 0.04 | 17 (2.9%)                         | 82 (5.2%)                            | 0.12 |
| McMaster, N(%)                                               | 65 (16.1%)              | 1,104 (8.9%)                 | 0.22 | 47 (8.0%)                         | 145 (9.3%)                           | 0.04 |
| Western, N(%)                                                | 38 (9.4%)               | 1,140 (9.2%)                 | 0.01 | 31 (5.3%)                         | 76 (4.9%)                            | 0.02 |
| Northern ON, N(%)                                            | 0 (0.0%)                | 74 (0.6%)                    | 0.11 |                                   |                                      |      |
| Other Cdn, N(%)                                              | 60 (14.9%)              | 1,433 (11.6%)                | 0.10 | 138 (23.5%)                       | 251 (16.0%)                          | 0.19 |
| Non-Cdn, N(%)                                                | 67 (16.6%)              | 4,432 (35.8%)                | 0.45 | 182 (31.1%)                       | 743 (47.5%)                          | 0.34 |
| LHINs                                                        |                         |                              |      |                                   |                                      |      |
| Toronto/Champlain                                            | 178 (44.1%)             | 2,951 (23.9%)                | 0.44 | 401 (68.4%)                       | 632 (40.4%)                          | 0.59 |
| South West, South East, Hamilton,<br>Niagara Haldimand Brant | 77 (19.1%)              | 2,515 (20.3%)                | 0.03 | 63 (10.8%)                        | 363 (23.2%)                          | 0.34 |
| Other (i.e. Low Supply)                                      | 149 (36.9%)             | 6,901 (55.8%)                | 0.38 | 122 (20.8%)                       | 569 (36.4%)                          | 0.35 |

Abbreviations: PCP – Primary Care Physician; SD – Standard Difference; SDev – Standard Deviation; IQR – Interquartile Range



Table 2: Practice Patterns of Physicians Providing Psychotherapy in Ontario.

|                                                        | PCP<br>Psychotherapists | PCP non-<br>psychotherapists | SD   | Psychiatrist -<br>psychotherapist | Psychiatrist non-<br>psychotherapist | SD   |
|--------------------------------------------------------|-------------------------|------------------------------|------|-----------------------------------|--------------------------------------|------|
| <b>Practice Patterns</b>                               | N=404                   | N=12,368                     |      | N=586                             | N=1,564                              |      |
| Total # outpatients (mean, SDev)                       | 218.27 (300.20)         | 1,425.64 (1,416.39)          | 1.18 | 131.76 (165.34)                   | 274.40 (286.26)                      | 0.61 |
| Total # outpatients (median, IQR)                      | 105 (48-272)            | 1,118 (604-1,732)            | 1.76 | 77 (40-165)                       | 189 (87-376)                         | 0.74 |
| Total # of new outpatients (mean, SDev)                | 125.12 (219.42)         | 869.31 (1,161.39)            | 0.89 | 55.74 (85.64)                     | 162.06 (200.36)                      | 0.69 |
| Total # of new outpatients (median, IQR)               | 40 (14-146)             | 516 (278-939)                | 1.65 | 26 (9-69)                         | 107 (41-210)                         | 0.95 |
| Total # of visits per outpatient patient (mean, SDev)  | 8.56 (7.50)             | 2.84 (2.80)                  | 1.01 | 13.77 (12.72)                     | 4.22 (3.97)                          | 1.01 |
| Total # of visits per outpatient patient (median, IQR) | 7 (4-11)                | 2 (2-3)                      | 1.31 | 10 (5-18)                         | 3 (2-5)                              | 1.49 |
| Mean # of visits per patient                           |                         |                              |      |                                   |                                      |      |
| 1-3                                                    | 112 (27.7%)             | 10,792 (87.3%)               | 1.51 | 77 (13.1%)                        | 998 (63.8%)                          | 1.22 |
| 4-16                                                   | 244 (60.4%)             | 1,475 (11.9%)                | 1.17 | 340 (58.0%)                       | 534 (34.1%)                          | 0.49 |
| 17+                                                    | 48 (11.9%)              | 101 (0.8%)                   | 0.47 | 169 (28.8%)                       | 32 (2.0%)                            | 0.80 |
| Total # of single visit outpatients (mean, SD)         | 84.23 (183.55)          | 772.25 (1,051.97)            | 0.91 | 31.95 (51.62)                     | 117.78 (158.94)                      | 0.73 |
| # with < 200 outpts annually (N,%)                     | 275 (68.1%)             | 1,383 (11.2%)                | 1.43 | 478 (81.6%)                       | 810 (51.8%)                          | 0.67 |
| # with < 100 outpts annually (N,%)                     | 198 (49.0%)             | 917 (7.4%)                   | 1.04 | 350 (59.7%)                       | 441 (28.2%)                          | 0.67 |
| # with < 40 outpts annually (N,%)                      | 79 (19.6%)              | 525 (4.2%)                   | 0.49 | 143 (24.4%)                       | 201 (12.9%)                          | 0.30 |

Abbreviations: PCP – Primary Care Physician; SD – Standard Difference; SDev – Standard Deviation; IQR – Interquartile Range

1  
2  
3  
4  
5  
6  
7  
8  
9  
10  
11  
12  
13  
14  
15  
16  
17  
18  
19  
20  
21  
22  
23  
24  
25  
26  
27  
28  
29  
30  
31  
32  
33  
34  
35  
36  
37  
38  
39  
40  
41  
42  
43  
44  
45  
46  
47

Table 3: Patient Characteristics by physician type.

|                                                           | PCP Psychotherapists | PCP non-psychotherapists | SD   | Psychiatrists - psychotherapist | Psychiatrist non-psychotherapist | SD   |
|-----------------------------------------------------------|----------------------|--------------------------|------|---------------------------------|----------------------------------|------|
| <b>Panel Characteristics: All patients, N(%)</b>          | N=95,569             | N=10,600,008             |      | N=80,028                        | N=403,929                        |      |
| Sex (%F)                                                  | 55,893 (58.5%)       | 5,743,955 (54.2%)        | 0.09 | 46,075 (57.6%)                  | 217,493 (53.8%)                  | 0.08 |
| Age, mean, (SDev)                                         | 43.74 (19.77)        | 42.14 (23.08)            | 0.07 | 43.79 (18.44)                   | 43.09 (20.26)                    | 0.04 |
| <18                                                       | 9,030 (9.4%)         | 1,901,785 (17.9%)        | 0.25 | 8,029 (10.0%)                   | 46,044 (11.4%)                   | 0.04 |
| 18-29                                                     | 15,675 (16.4%)       | 1,523,601 (14.4%)        | 0.06 | 12,276 (15.3%)                  | 73,738 (18.3%)                   | 0.08 |
| 30-39                                                     | 15,213 (15.9%)       | 1,344,577 (12.7%)        | 0.09 | 11,651 (14.6%)                  | 60,516 (15.0%)                   | 0.01 |
| 40-49                                                     | 16,578 (17.3%)       | 1,470,261 (13.9%)        | 0.10 | 13,875 (17.3%)                  | 64,414 (15.9%)                   | 0.04 |
| 50-64                                                     | 24,838 (26.0%)       | 2,385,287 (22.5%)        | 0.08 | 24,122 (30.1%)                  | 98,124 (24.3%)                   | 0.13 |
| >64                                                       | 14,235 (14.9%)       | 1,974,497 (18.6%)        | 0.10 | 10,075 (12.6%)                  | 61,093 (15.1%)                   | 0.07 |
| Immigrant                                                 | 12,396 (13.0%)       | 1,643,862 (15.5%)        | 0.07 | 10,776 (13.5%)                  | 48,013 (11.9%)                   | 0.05 |
| Income Quintile                                           |                      |                          |      |                                 |                                  |      |
| Q1                                                        | 17,603 (18.4%)       | 1,903,886 (18.0%)        | 0.01 | 16,144 (20.2%)                  | 96,729 (23.9%)                   | 0.09 |
| Q2                                                        | 18,224 (19.1%)       | 2,024,154 (19.1%)        | 0.00 | 14,787 (18.5%)                  | 81,261 (20.1%)                   | 0.04 |
| Q3                                                        | 17,667 (18.5%)       | 2,134,174 (20.1%)        | 0.04 | 13,970 (17.5%)                  | 74,383 (18.4%)                   | 0.02 |
| Q4                                                        | 19,323 (20.2%)       | 2,331,854 (22.0%)        | 0.04 | 15,571 (19.5%)                  | 75,913 (18.8%)                   | 0.02 |
| Q5                                                        | 22,197 (23.2%)       | 2,150,212 (20.3%)        | 0.07 | 18,930 (23.7%)                  | 72,734 (18.0%)                   | 0.14 |
| Missing                                                   | 555 (0.6%)           | 55,728 (0.5%)            | 0.01 | 626 (0.8%)                      | 2,909 (0.7%)                     | 0.01 |
| LHINs                                                     |                      |                          |      |                                 |                                  |      |
| Toronto/Champlain                                         | 32,946 (34.5%)       | 1,882,733 (17.8%)        | 0.49 | 33,082 (41.3%)                  | 87,269 (21.6%)                   | 0.43 |
| South West, South East, Hamilton, Niagara Haldimand Brant | 17,824 (18.7%)       | 2,203,072 (20.8%)        | 0.05 | 8,448 (10.6%)                   | 95,488 (23.6%)                   | 0.35 |
| Other (i.e. Low Supply)                                   | 44,718 (46.8%)       | 6,500,401 (61.3%)        | 0.29 | 38,366 (47.9%)                  | 220,478 (54.6%)                  | 0.13 |
| Missing                                                   | 81 (0.1%)            | 13,802 (0.1%)            | 0.01 | 132 (0.2%)                      | 694 (0.2%)                       | 0.00 |
| MHA need*, N(%)                                           |                      |                          |      |                                 |                                  |      |
| MHA Hospital Discharge                                    | 4,086 (4.3%)         | 81,199 (0.8%)            | 0.23 | 6,713 (8.4%)                    | 43,902 (10.9%)                   | 0.08 |

|                                |              |                |      |               |                |      |
|--------------------------------|--------------|----------------|------|---------------|----------------|------|
| ED MHA                         | 5,819 (6.1%) | 166,951 (1.6%) | 0.24 | 9,659 (12.1%) | 60,503 (15.0%) | 0.09 |
| ED Substance Abuse (2+ visits) | 1,168 (1.2%) | 13,421 (0.1%)  | 0.13 | 888 (1.1%)    | 5,714 (1.4%)   | 0.03 |
| ED SH                          | 1,149 (1.2%) | 26,216 (0.2%)  | 0.11 | 1,784 (2.2%)  | 10,648 (2.6%)  | 0.03 |

Abbreviations: PCP – Primary Care Physician; SD – Standard Difference; SDev – Standard Deviation; IQR – Interquartile Range; MHA – Mental Health and Addictions; ED – Emergency Department; SH – Self-Harm

Confidential

Table 4: Follow-up by physician type within 30- and 180-days.

|                                           | MHA Hospital Discharge | ED MHA         | ED SH         | ED Substance Use (2+ visits) |
|-------------------------------------------|------------------------|----------------|---------------|------------------------------|
| Total Number of Index Event               | N=96247                | N=192641       | N=28699       | N=16022                      |
| Visit within 30 days, N (%)               |                        |                |               |                              |
| Visit to psychiatrist psychotherapist     | 3004 (3.12)            | 4232 (2.2)     | 835 (2.91)    | 187 (1.17)                   |
| Visit to psychiatrist non-psychotherapist | 27625 (28.7)           | 44736 (23.22)  | 8311 (28.96)  | 2224 (13.88)                 |
| Visit to PCP Psychotherapist              | 1969 (2.05)            | 2443 (1.27)    | 450 (1.57)    | 436 (2.72)                   |
| MHA Visit to PCP Non-psychotherapist*     | 26465 (27.5)           | 53565 (27.81)  | 8098 (28.22)  | 4658 (29.07)                 |
| None of the above                         | 47329 (49.17)          | 104563 (54.28) | 14254 (49.67) | 9654 (60.25)                 |
| Within 180 Days of Index Event, N(%)      |                        |                |               |                              |
| Visit to psychiatrist psychotherapist     | 5430 (5.64)            | 8759 (4.55)    | 1612 (5.62)   | 547 (3.41)                   |
| Visit to psychiatrist non-psychotherapist | 45694 (47.48)          | 73462 (38.13)  | 12780 (44.53) | 4707 (29.38)                 |
| Visit to PCP Psychotherapist              | 3835 (3.98)            | 5372 (2.79)    | 1016 (3.54)   | 1153 (7.2)                   |
| MHA Visit to PCP Non-psychotherapist*     | 45817 (47.6)           | 92053 (47.78)  | 14492 (50.5)  | 8655 (54.02)                 |
| None of the above                         | 27228 (28.29)          | 65470 (33.99)  | 8367 (29.15)  | 5553 (34.66)                 |

Abbreviations: MHA – Mental Health and Addictions; ED – Emergency Department; SH – Self-Harm

Appendix Table 1: OHIP billing codes used to capture psychiatrist and PCP psychotherapy.

|                                          |                                                                                                                                      |
|------------------------------------------|--------------------------------------------------------------------------------------------------------------------------------------|
| Psychiatrist Psychotherapy Billing Codes | K197, K195, K208, K209, K203, K204, K205, K206, K192, K194 OR K198<br>(only counted if used $\geq 12$ times in a fiscal year period) |
| PCP Psychotherapy Billing Codes          | K197, K195, K208, K209, K203, K204, K205, K206, K192, K194                                                                           |

Confidential
